# Supplementary material for: Nuclear Expression of TDP-43 Is Linked with Morphology and Ubiquitylation of Cytoplasmic Aggregates in Amyotrophic Lateral Sclerosis
Source: MDPI journal article supplement (doi:10.3390/ijms241512176), 2023-07-29
Supplement: s1 [file s1]

Table S1. tissue availability

|         | disease<br>duration | PMC | XII CN<br>nucleus | TDP-43 pathology in LMN system |     |     |     |     |               |     |     |     |     |     |             |     |     |     |     |             |           |         |           |         |      |
|---------|---------------------|-----|-------------------|--------------------------------|-----|-----|-----|-----|---------------|-----|-----|-----|-----|-----|-------------|-----|-----|-----|-----|-------------|-----------|---------|-----------|---------|------|
|         |                     |     |                   | cervical cord                  |     |     |     |     | thoracic cord |     |     |     |     |     | lumbar cord |     |     |     |     | sacral cord | n/c-ir in | c-ir in | n/c-ir in | c-ir in |      |
|         |                     |     |                   | C4                             | C5  | C6  | C7  | C8  | T1            | T2  | T3  | T4  | T5  | T6  | L1          | L2  | L3  | L4  | L5  |             | S2        | neuron  | neuron    | glia    | glia |
|         |                     |     |                   |                                |     |     |     |     |               |     |     |     |     |     |             |     |     |     |     |             |           | neuron  | neuron    | glia    | glia |
| case 1  | 6                   | yes | yes               | yes                            | yes | yes | yes | yes | yes           | yes | yes | yes | yes | yes | yes         | yes | yes | yes | yes | 34          | 31        | 10      | 1         |         |      |
| case 2  | 8                   | yes | yes               | yes                            | yes | yes | yes | yes | yes           | yes | yes | yes | yes | yes | yes         | yes | yes | yes | yes | 9           | 67        | 112     | 1         |         |      |
| case 3  | 9                   | yes | yes               | yes                            | yes | yes | yes | yes | yes           | yes | yes | yes | yes | yes | yes         | yes | yes | yes | yes | 7           | 58        | 252     | 2         |         |      |
| case 4  | 12                  | yes | yes               | NA                             | NA  | NA  | yes | yes | yes           | yes | yes | yes | yes | yes | NA          | yes | yes | yes | yes | yes         | 4         | 44      | 15        | 1       |      |
| case 5  | 12                  | yes | yes               | yes                            | yes | yes | yes | yes | yes           | yes | yes | yes | yes | yes | yes         | yes | yes | yes | yes | yes         | 0         | 4       | 98        | 2       |      |
| case 6  | 12                  | yes | yes               | yes                            | NA  | yes | yes | yes | yes           | yes | yes | yes | yes | yes | yes         | yes | NA  | NA  | yes | yes         | 6         | 44      | 65        | 0       |      |
| case 7  | 13                  | yes | yes               | yes                            | yes | NA  | yes | yes | yes           | yes | yes | yes | yes | yes | yes         | yes | yes | yes | yes | yes         | 6         | 38      | 105       | 5       |      |
| case 8  | 15                  | yes | yes               | yes                            | yes | yes | yes | yes | NA            | yes | yes | yes | yes | yes | yes         | yes | yes | yes | yes | yes         | 4         | 50      | 26        | 0       |      |
| case 9  | 15                  | yes | yes               | NA                             | yes | yes | yes | yes | yes           | yes | yes | yes | yes | yes | yes         | yes | yes | yes | yes | yes         | 3         | 30      | 36        | 4       |      |
| case 10 | 18                  | yes | yes               | yes                            | yes | yes | yes | yes | yes           | yes | yes | yes | yes | yes | yes         | NA  | yes | yes | yes | yes         | 1         | 19      | 34        | 0       |      |
| case 11 | 18                  | yes | yes               | yes                            | yes | NA  | yes | yes | yes           | yes | yes | yes | yes | yes | yes         | yes | yes | yes | yes | yes         | 25        | 80      | 25        | 2       |      |
| case 12 | 20                  | yes | yes               | yes                            | NA  | NA  | NA  | NA  | yes           | yes | yes | yes | yes | yes | yes         | yes | yes | yes | yes | yes         | 7         | 24      | 176       | 6       |      |
| case 13 | 22                  | yes | yes               | yes                            | yes | yes | yes | yes | yes           | yes | yes | yes | yes | yes | yes         | yes | yes | yes | yes | yes         | 11        | 26      | 51        | 0       |      |
| case 14 | 28                  | yes | yes               | yes                            | yes | yes | yes | yes | yes           | yes | yes | yes | yes | yes | yes         | NA  | NA  | yes | yes | yes         | yes       | 3       | 33        | 126     | 1    |
| case 15 | 31                  | yes | yes               | yes                            | yes | NA  | yes | yes | yes           | yes | yes | yes | yes | yes | yes         | NA  | yes | yes | yes | yes         | 4         | 43      | 106       | 0       |      |
| case 16 | 40                  | yes | yes               | yes                            | yes | yes | yes | yes | yes           | yes | yes | yes | yes | yes | yes         | NA  | yes | yes | yes | yes         | yes       | 6       | 15        | 21      | 1    |
| case 17 | 49                  | yes | yes               | yes                            | yes | yes | yes | yes | yes           | yes | yes | yes | yes | yes | yes         | yes | yes | yes | yes | yes         | yes       | 0       | 15        | 16      | 0    |
| case 18 | 55                  | yes | yes               | NA                             | yes | yes | yes | yes | NA            | yes | yes | yes | yes | yes | yes         | yes | NA  | yes | yes | yes         | yes       | 0       | 8         | 9       | 0    |
| case 19 | 60                  | yes | yes               | yes                            | NA  | yes | yes | yes | yes           | yes | yes | yes | yes | yes | yes         | yes | yes | yes | yes | yes         | yes       | 0       | 9         | 175     | 2    |
| case 20 | 64                  | yes | yes               | yes                            | yes | yes | yes | yes | yes           | yes | yes | yes | yes | yes | yes         | yes | yes | yes | yes | yes         | yes       | 0       | 10        | 77      | 0    |
| case 21 | 84                  | yes | yes               | yes                            | NA  | yes | yes | yes | yes           | yes | yes | yes | yes | yes | yes         | yes | yes | yes | yes | yes         | yes       | 0       | 7         | 65      | 1    |
| case 22 | 132                 | yes | yes               | yes                            | yes | yes | yes | yes | yes           | yes | yes | yes | yes | yes | yes         | NA  | yes | yes | yes | yes         | yes       | 0       | 5         | 30      | 0    |
| total   |                     |     |                   |                                |     |     |     |     |               |     |     |     |     |     |             |     |     |     |     |             | 130       | 660     | 1630      | 29      |      |

LMN lower motor neuron, NA not available, PMC primary motor cortex, XII CN XIIth cranial nerve (hypoglossal nerve)

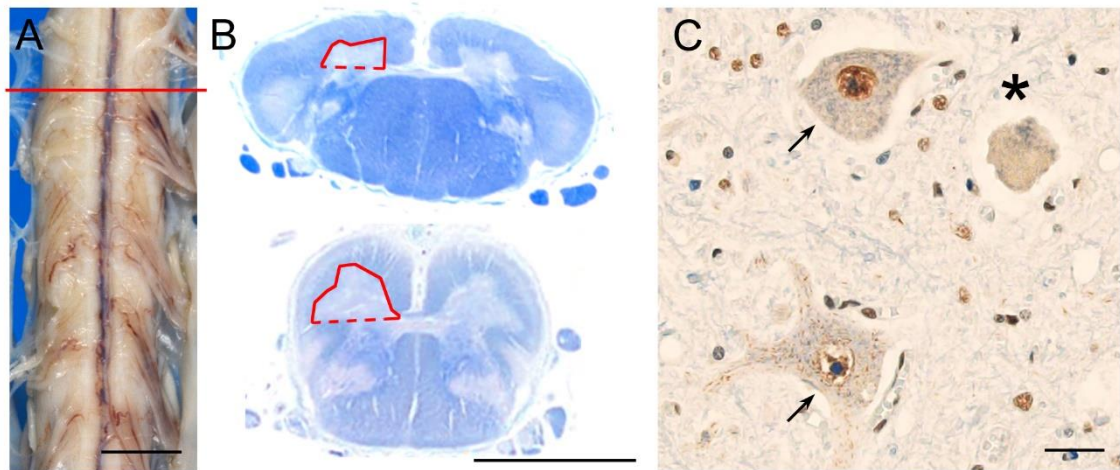

**Figure S1. Tissue preparation and neuron counting protocol.**

(A) We transversely cut the spinal cord at the most rostral point where the anterior roots exit the cord parenchyma (a red line). (B) In this study, the front border of the anterior horn was defined as the boundary between the anterior column and gray matter (solid red curves). The dorsal border of the anterior horn was defined by a line connecting the most dorsal point of the medial anterior column and the most lateral point of the anterior gray matter (broken red lines). (C) We counted neurons in which nuclei were present on the slide (arrows), whereas we dropped those without visible nuclei (asterisk). Scale bars (A and B) 5 mm and (C) 10  $\mu$ m.

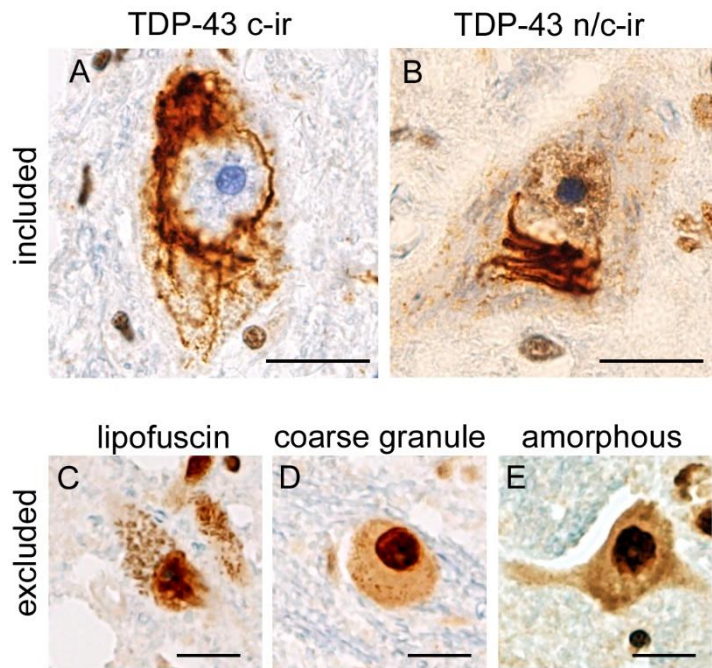

**Figure S2. Inclusion and exclusion criteria for TDP-43 aggregates.**

Cytoplasmic TDP-43 aggregates with nuclear clearance were defined as TDP-43 c-ir (cytoplasmic immunoreactivity) (A), whereas those combined with nuclear expression were defined as TDP-43 n/c-ir (nuclear and cytoplasmic immunoreactivity) (B). Lipofuscin (C), coarse granular (D), and amorphous diffuse staining (E) of the cytoplasm was observed in both ALS-TDP cases and control subjects, suggesting nonspecific reactions. Anti-TDP-43 immunohistochemistry. Scale bars = 10  $\mu$ m.

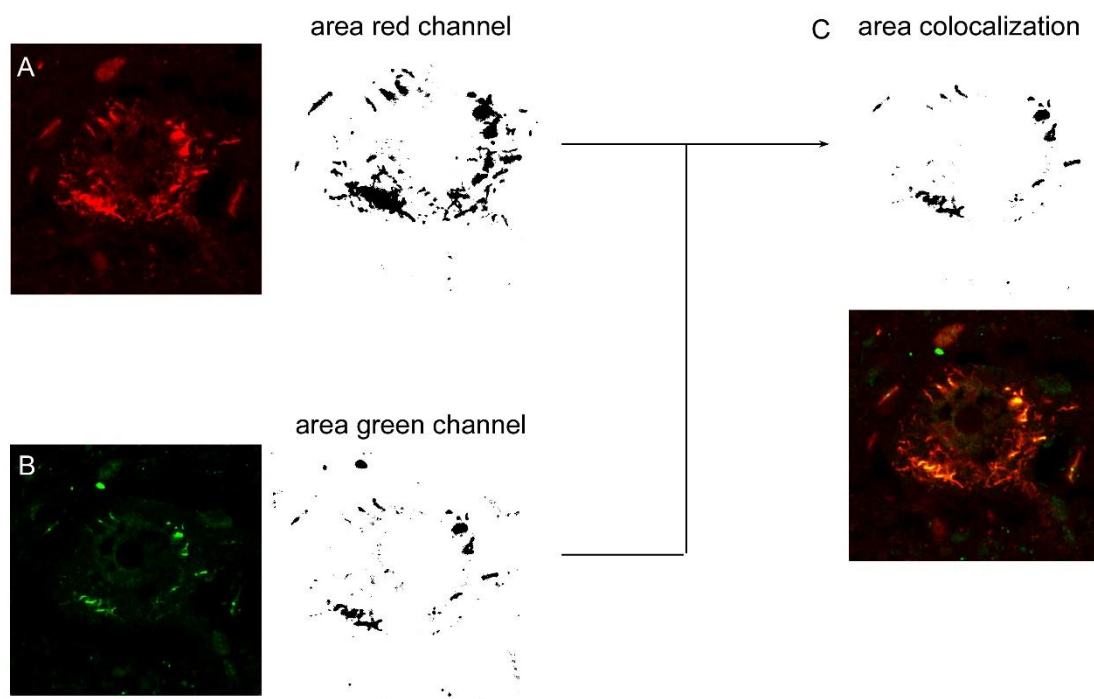

**Figure S3. Colocalization analysis.** We took photomicrographs under  $\times 1000$  magnification. For each neuron, fluorescent signals from red (A) and green (B) channels were automatically detected using the Otsu threshold of ImageJ. Pixels shared between red and green signal areas (C) were automatically detected with the 'AND' operation of the software, followed by measurement of the colocalized area.

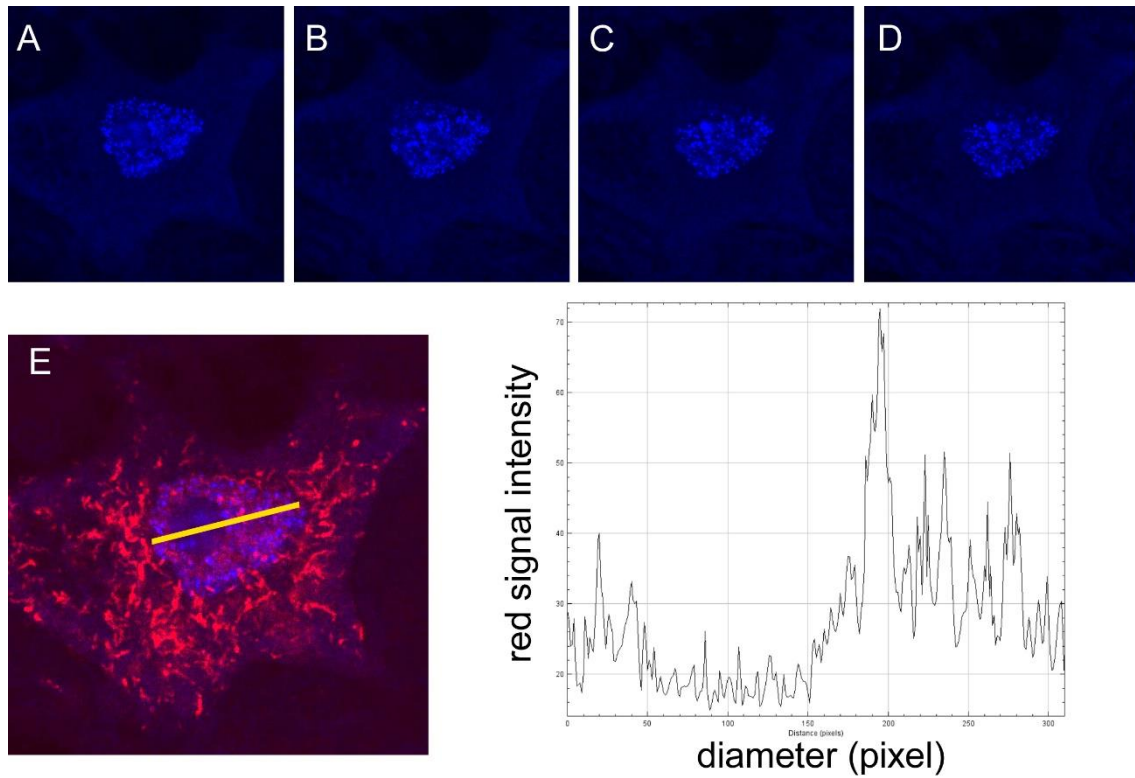

**Figure S4. Measurement of fluorescent signal intensity.**

(A-D) A stacked image was generated for each neuron. The slice where the nucleus most largely appeared was assessed. (E) We identified the longest diameter running across the nucleus on the basis of DAPI staining, and signal intensities of the red channel (TDP-43) were measured along the nuclear diameter. For each neuron, we computed an averaged signal intensity as  $[(\text{total signal intensity value}) / (\text{pixel counts along the diameter})]$ , which was defined as the nuclear signal intensity of the neuron.
